# Supplementary material for: Managing fire risk during drought: the influence of certification andEl Niño on fire-driven forest conversion for oil palm in SoutheastAsia
Source: Copernicus journal article supplement (doi:10.5194/esd-2017-2), 2017-01-09
Supplement: Supplementary file [file esd-2017-2-AC3-supplement.pdf]

### Reviewer 3: Figures

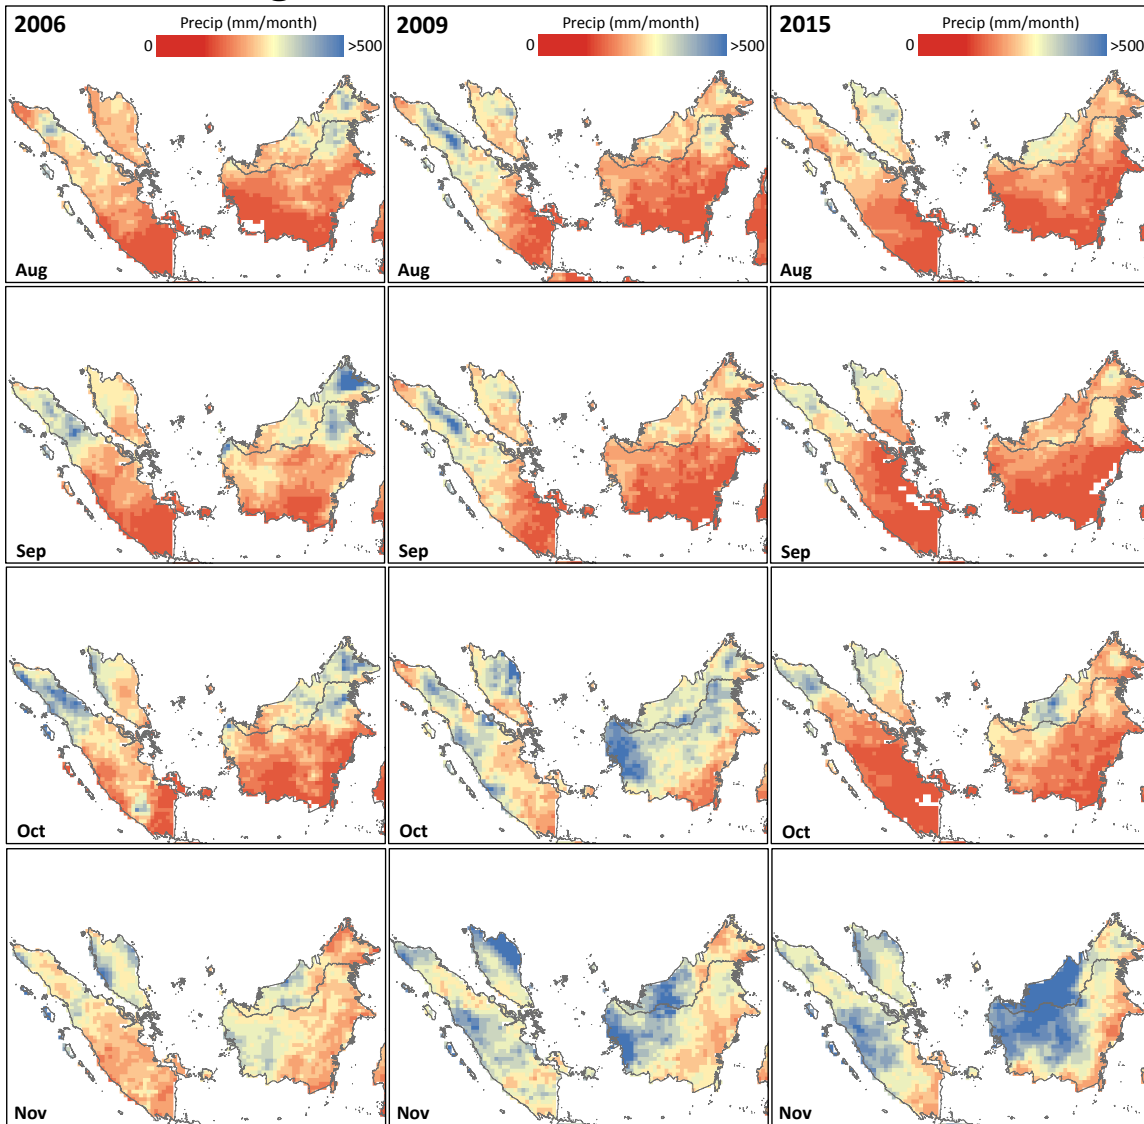

Figure R2: Maps show monthly totals of the precipitation patterns for Indonesia and Malaysia from Tropical Rainfall Measuring Mission (TRMM, 3B43v7) at 0.25° resolution during the dry season in El Niño years of 2006, 2009, and 2015. The spatial distribution of dryness was severe in El Niño year 2015, but dry conditions extended until November in 2006.

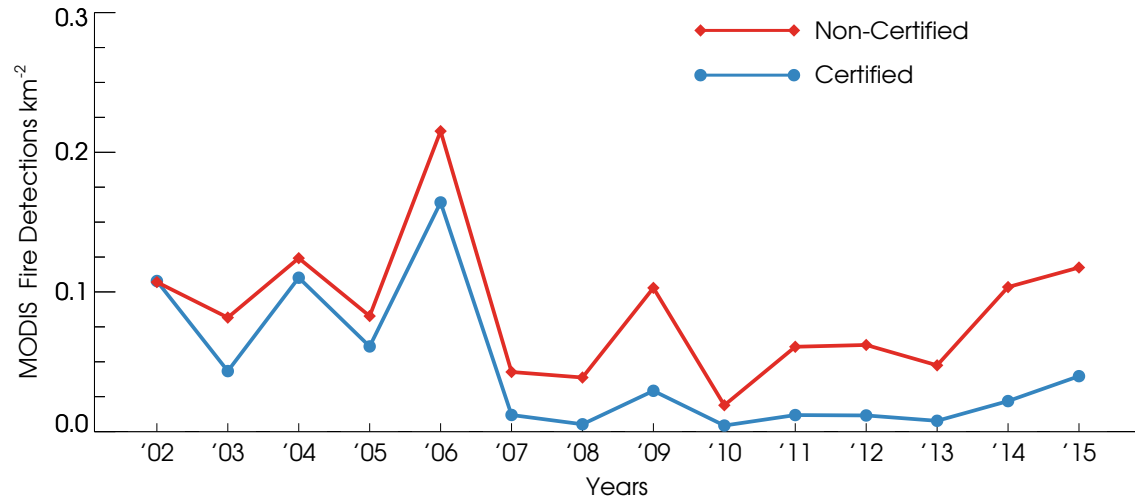

Figure R4. Time series of MODIS active fire detections, as in Figure 5, for certified plantations and the subset of non-certified plantations within 50 km of a certified plantation in Indonesia.
